# Supplementary material
Source: MDPI journal article supplement (https://www.mdpi.com/2673-9992/12/1/18)
Supplement: s1 [file s1]

# New Fluoroquinolone-phenothiazine Hybrids and their Antimicrobial Activity

M.C. Posso<sup>1\*</sup>, J. L. Serrano<sup>1</sup>, P. Almeida<sup>1</sup>, F. Domingues<sup>1</sup>, S. Silvestre<sup>1</sup> and S. Ferreira<sup>1</sup>

<sup>1</sup> CICS-UBI - Health Sciences Research Centre of University of Beira Interior, Covilhã, 6200-220, Portugal

\*marina.posso@ubi.pt

## BACKGROUND

Fluoroquinolones are classified by WHO as “Watch” – group with **higher resistance potential**.

Efflux pumps display an **important role** and have been associated with multidrug resistance. **Efflux pump inhibitors (EPI)** can be an approach to **restore the antimicrobial activity**.

Phenothiazines have **EPI properties** and inhibit biofilm formation<sup>1</sup>.

Hybridization of **ciprofloxacin (CIP)** and **phenothiazines**: display antibacterial and efflux pump inhibitory activities?

## METHODS

### 1 Synthesis

nucleophilic reaction

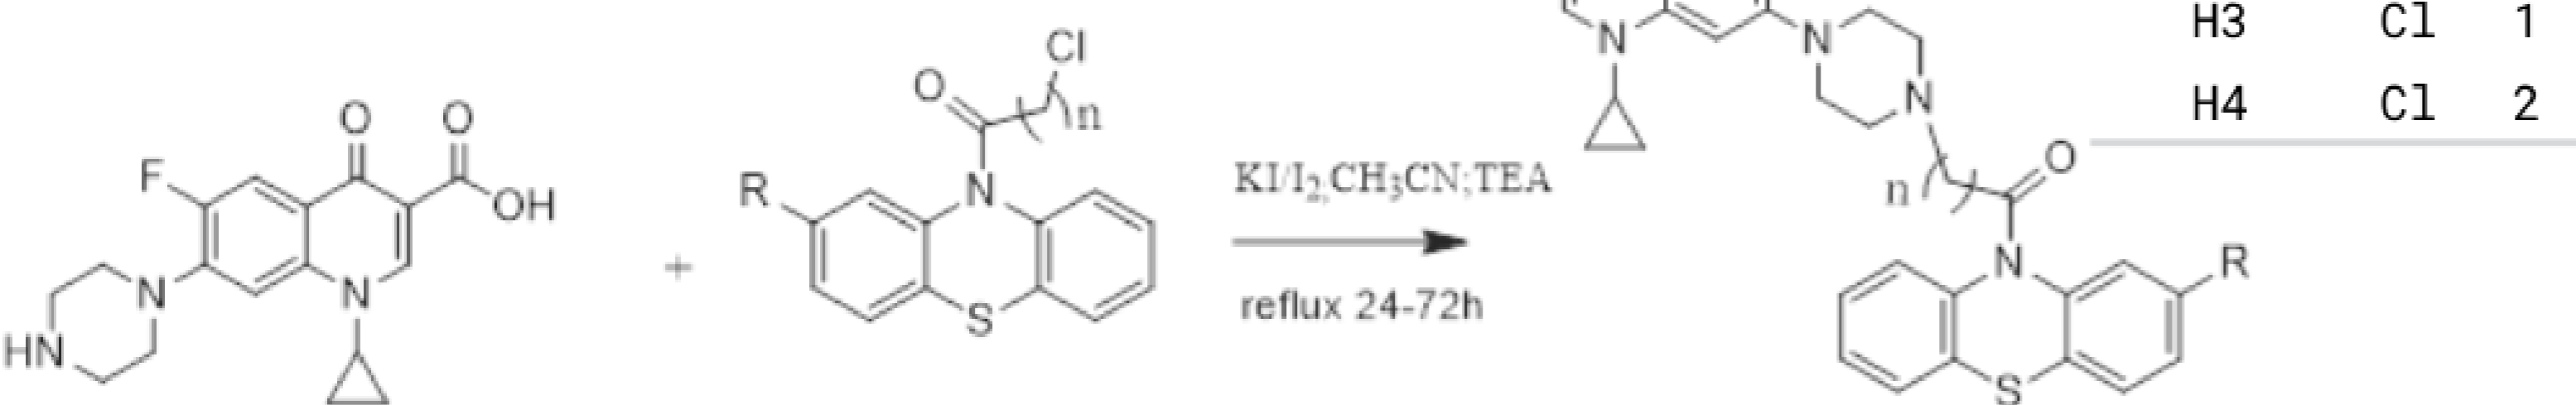

### 2 Structure confirmation

nuclear magnetic resonance and infrared spectroscopy

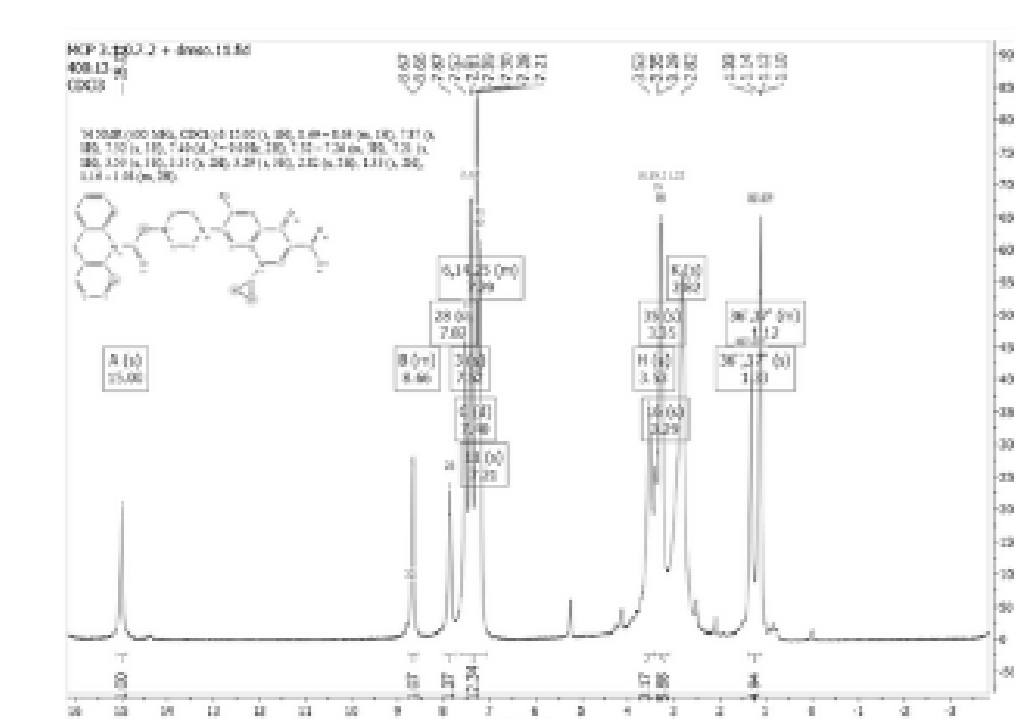

### 3 Molecular Dynamics

Docking NorA (homology - AlphaFold Swiss Model. Access: P0A0J7)

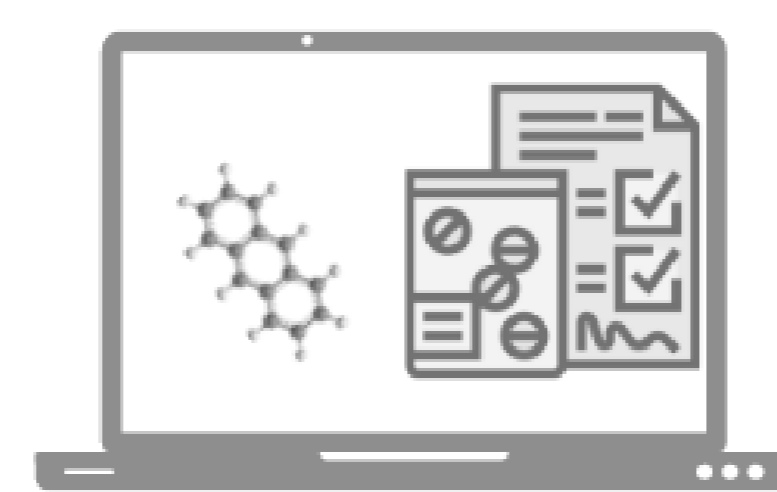

### 4 MIC - Minimum inhibitory concentration

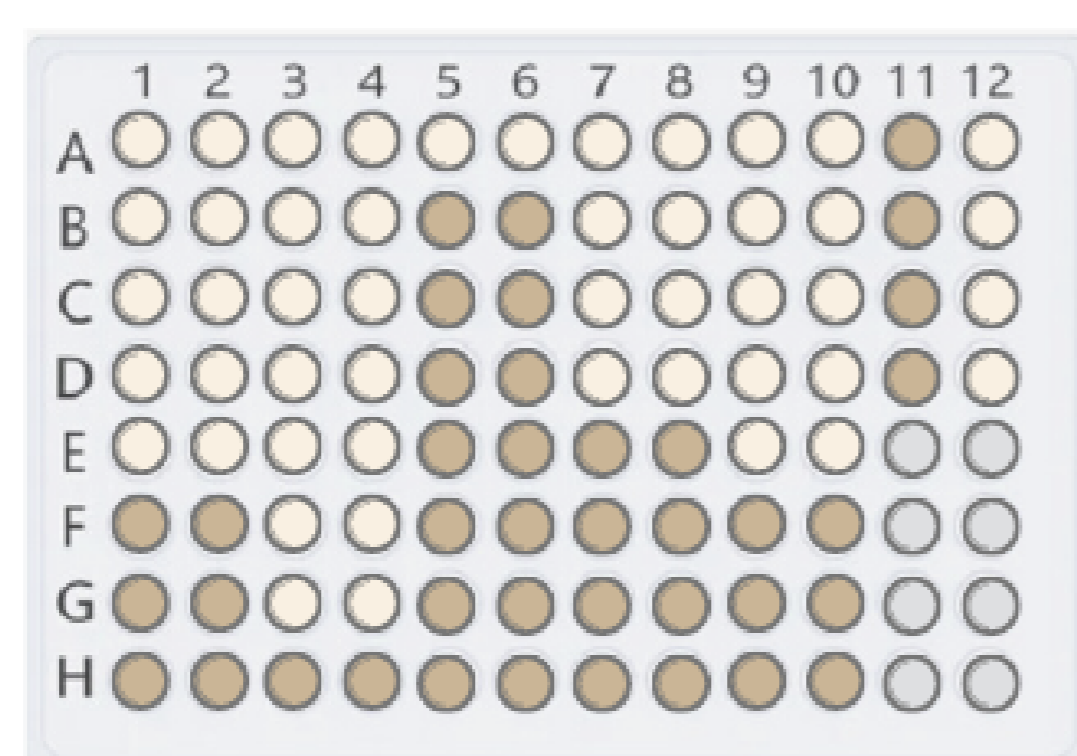

● Growth ○ No growth

### 5 Plate the no growth wells in compound-free agar

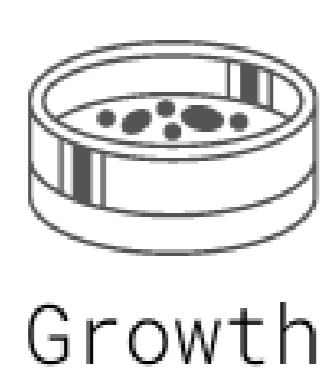

Growth No growth

**MBC - Minimum bactericidal concentration**

## RESULTS

**TABLE 1.** MIC and MBC results for *S. aureus* wild-type (SA1199) and NorA overexpressing (SA1199B) strains. Data are the result of at least three independent assays.

|     | <i>S. aureus</i> SA1199 |             | <i>S. aureus</i> SA1199B (NorA ++) |             |
|-----|-------------------------|-------------|------------------------------------|-------------|
|     | MIC (μM)                | MBC (μM)    | MIC (μM)                           | MBC (μM)    |
| CIP | 3.125                   | 12.5        | 12.5                               | 25          |
| H1  | 6.25                    | 12.5        | 12.5                               | 100         |
| H2  | <b>3.125</b>            | <b>12.5</b> | <b>6.25</b>                        | <b>12.5</b> |
| H3  | 6.25                    | 100         | 200                                | 200         |
| H4  | 3.125                   | 25          | 25                                 | 50          |

H2 and H4 kept the antimicrobial activity against the wild-type isolate and H2 **potentiate** antimicrobial activity against *S. aureus* SA1199B.

**TABLE 2.** Molecular docking results of H2, ciprofloxacin, and chlorpromazine (CHP)

| Compounds | Residues implicated in the interaction                                                                                                                                   | Docking score (kcal/mol) |
|-----------|--------------------------------------------------------------------------------------------------------------------------------------------------------------------------|--------------------------|
| CIP       | H bond: ARG98; GLU222; SER219.<br>Hydrophobic: ILE19; <b>ILE23</b> ; LEU43; PHE47; ALA48; PHE 140; LEU218; ARG310; ASN340. π-σ: VAL44.<br>π-stacking: PHE140.            | -7.66                    |
| CHP       | H bond: ASN137.<br>π-anion: ASP307.<br>Hydrophobic: ILE141; ILE136; LEU218; PRO311; ARG310; GLN255; ALA252; GLY248; PRO144, GLU222; ILE136.                              | -6.48                    |
| H2        | H bond: ARG98; GLU222; SER337.<br>Hydrophobic: PHE16; ILE19; VAL22; <b>ILE23</b> ; ILE26; PHE140; THR223; ASN340.<br>π-σ: VAL44. π-lone pair: GLN51. π-π: <b>PHE47</b> . | <b>-8.46</b>             |

H2 interacts with NorA **groove binding site**<sup>2</sup> (residues in bold).

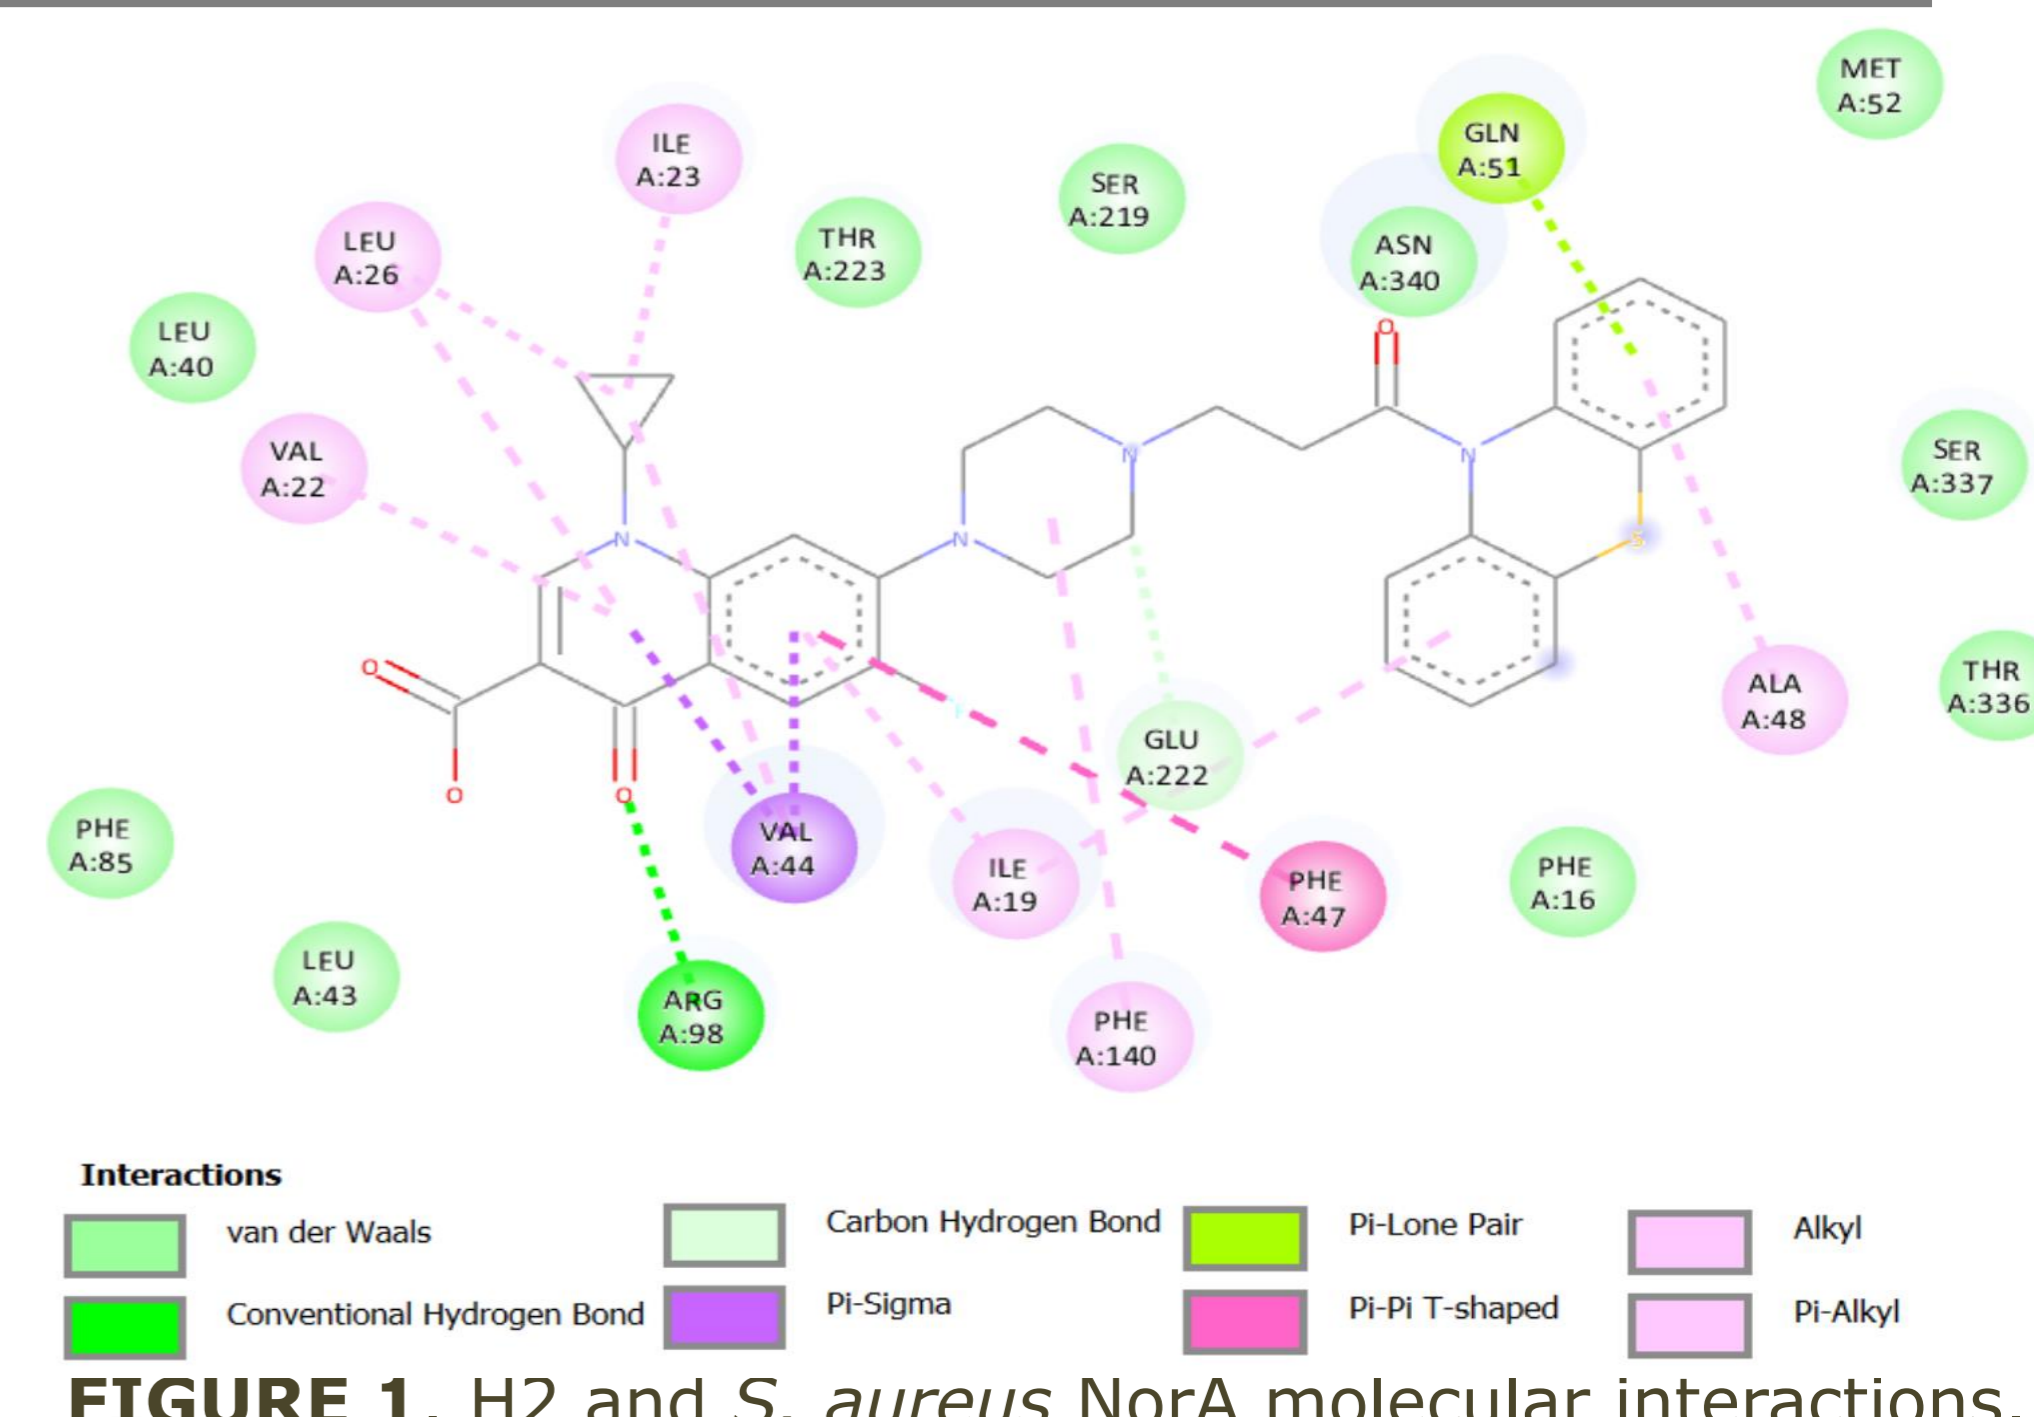

**FIGURE 1.** H2 and *S. aureus* NorA molecular interactions.

## Acknowledgements

"This work was supported by FCT grants UIDB/00709/2020 and UIDP/00709/2020. The authors gratefully acknowledge the bacterial strains donation by Dr. Lorena Tuchescher.

## CONCLUSIONS

- Hybridization of CIP and phenothiazines was able to **maintain CIP activity** for *S. aureus* wild-type (SA1199) while it was able to potentiate CIP activity against the overexpressing NorA strain (SA1199B).
- The activity of this new molecule (H2) may be the result of a synergetic antibacterial and efflux pump inhibitory activity.

## References

- Grimsey, E.M.; Piddock, L.J. V Do Phenothiazines Possess Antimicrobial and Efflux Inhibitory Properties? *FEMS Microbiol. Rev.* **2019**, *43*, 577–590, doi:10.1093/femsre/fuz017.
- Zárata, S.G.; Morales, P.; Świderek, K.; Bolanos-García, V.M.; Bastida, A. A Molecular Modeling Approach to Identify Novel Inhibitors of the Major Facilitator Superfamily of Efflux Pump Transporters. *Antibiot. (Basel, Switzerland)* **2019**, *8*, doi:10.3390/antibiotics8010025.
